# Supplementary material
Source: Royal Society of Chemistry journal article supplement (doi:10.1039/d6ew00248j)
Supplement: d6ew00248j1.pdf [file d6ew00248j1.pdf]

**Supporting Information**

**Removal of Lead Phosphate Nanoparticles from Drinking Water by  
Hydrogen Peroxide Photolysis Combined with Point-of-Use Filtration**

Cheng Tan and Haizhou Liu\*

Department of Chemical and Environmental Engineering, University of California at Riverside,  
Riverside, CA 92521 USA

\* Corresponding author, e-mail: [haizhou@engr.ucr.edu](mailto:haizhou@engr.ucr.edu)

phone (951) 827-2076, fax (951) 827-5696

Number of pages: 14

Number of figures: 8

Number of texts: 3

## Table of Contents

|                                                                                                                                                                                                                                                                                                                                                                                                   |     |
|---------------------------------------------------------------------------------------------------------------------------------------------------------------------------------------------------------------------------------------------------------------------------------------------------------------------------------------------------------------------------------------------------|-----|
| <b>Text S1</b> Calculation of the UV dosage in the UV/H <sub>2</sub> O <sub>2</sub> system.....                                                                                                                                                                                                                                                                                                   | S3  |
| <b>Figure S1</b> Atrazine degradation (10 mg/L) under direct photolysis in DI water at pH 7.....                                                                                                                                                                                                                                                                                                  | S5  |
| <b>Text S2</b> Detection of Lead Dioxide (PbO <sub>2</sub> ) in Drinking Water .....                                                                                                                                                                                                                                                                                                              | S6  |
| <b>Figure S2</b> Percentages of Pb removal after POU faucet filtration with and without UV/H <sub>2</sub> O <sub>2</sub> treatment in synthetic drinking water with 2 mM NaClO <sub>4</sub> at pH 7. (A): [Nano-Pb-PO <sub>4(s)</sub> ]=0.1 mg Pb/L and [H <sub>2</sub> O <sub>2</sub> ]=0.5 mg/L; and (B): [Nano-Pb-PO <sub>4(s)</sub> ]=1 mg/L and [H <sub>2</sub> O <sub>2</sub> ]=5 mg/L..... | S7  |
| <b>Figure S3</b> H <sub>2</sub> O <sub>2</sub> concentrations with and without 1 mg/L Nano-Pb-PO <sub>4</sub> in synthetic drinking water with 2 mM NaClO <sub>4</sub> at pH 7.....                                                                                                                                                                                                               | S8  |
| <b>Figure S4</b> Percentages of Pb removal after POU faucet filtration with and without H <sub>2</sub> O <sub>2</sub> in synthetic drinking water at pH 7. Treatment received no UV exposure. ([Nano-Pb-PO <sub>4(s)</sub> ]=0.1 mg Pb/L and [H <sub>2</sub> O <sub>2</sub> ]=0.5 mg/L; and [Nano-Pb-PO <sub>4(s)</sub> ]=1 mg/L and [H <sub>2</sub> O <sub>2</sub> ]=5 mg/L).....                | S9  |
| <b>Figure S5</b> The formation of Pb(IV) due to the oxidation of nano-Pb-PO <sub>4</sub> under the UV/H <sub>2</sub> O <sub>2</sub> in synthetic drinking water at pH 7. [Nano-Pb-PO <sub>4</sub> ]=1 mg Pb/L and [H <sub>2</sub> O <sub>2</sub> ]=5 mg/L. ....                                                                                                                                   | S10 |
| <b>Text S3</b> Calculation of the formation rate constant of PbO <sub>2(s)</sub> .....                                                                                                                                                                                                                                                                                                            | S11 |
| <b>Figure S6</b> Nitrobenzene (1 mg/L) degradation under the UV-H <sub>2</sub> O <sub>2</sub> with 5 mg/L of H <sub>2</sub> O <sub>2</sub> at pH 7. The formation rate constant of PbO <sub>2(s)</sub> was calculated based on the steady state concentration of HO· and the oxidation kinetics of Pb(II) to Pb(IV) (Figure S6): .....                                                            | S11 |
| <b>Figure S7</b> Oxidation kinetics of Pb(II) to Pb(IV) under the UV/H <sub>2</sub> O <sub>2</sub> . [Nano-Pb-PO <sub>4</sub> ]=1 mg Pb/L and [H <sub>2</sub> O <sub>2</sub> ]=5 mg/L.....                                                                                                                                                                                                        | S12 |
| <b>Figure S8</b> The percentage of Pb(IV) with sizes bigger than 0.45 μm to total Pb particles after the UV/H <sub>2</sub> O <sub>2</sub> in synthetic drinking water with 2 mM NaClO <sub>4</sub> at pH 7. [Nano-Pb-PO <sub>4</sub> ]=0.1 mg Pb/L and [H <sub>2</sub> O <sub>2</sub> ]=0.5 mg/L, and [Nano-Pb-PO <sub>4</sub> ]=1 mg/L and [H <sub>2</sub> O <sub>2</sub> ]=5 mg/L.....          | S13 |
| <b>Figure S9</b> Characterization of 1 mg Pb/L of nano-Pb-PO <sub>4</sub> before the UV/H <sub>2</sub> O <sub>2</sub> . (A): SEM image; and (B): elemental composition of the Pb particles.....                                                                                                                                                                                                   | S14 |
| <b>Figure S10</b> Characterization of 1 mg Pb/L of nano-Pb-PO <sub>4</sub> after the UV/H <sub>2</sub> O <sub>2</sub> . (A): SEM image; and (B): elemental composition of the Pb particles.....                                                                                                                                                                                                   | S15 |

**Text S1** Calculation of the UV dosage in the UV/H<sub>2</sub>O<sub>2</sub> system

To quantify the UV intensity of the UV system in this study, the atrazine degradation experiment was conducted. 3.5 L of atrazine solution (10 mg/L) was exposed in UV light for 10 min with other conditions same as the nano-Pb-PO<sub>4</sub> exposure experiment. 2 mL of the solution was collected at different time points (0, 1, 2, 4, 6, 8 and 10 minutes), and measured for atrazine concentration.

Atrazine actinometry was based on the degradation kinetics of atrazine:

$$-\frac{dC}{dt} = 2.303 \cdot \phi_{atr} \cdot \varepsilon_{atr} \cdot I_0 \cdot C_{atr} \cdot t$$

$$-\frac{\ln\left(\frac{C}{C_0}\right)}{t} = 2.303 \cdot \phi_{atr} \cdot \varepsilon_{atr} \cdot I_0$$

$$I_0 = \frac{-\frac{\ln\left(\frac{C}{C_0}\right)}{t}}{2.303 \cdot \phi_{atr} \cdot \varepsilon_{atr}}$$

From atrazine degradation data in Figure S1:  $-\frac{\ln\left(\frac{C}{C_0}\right)}{t} = 0.00247 \text{ s}^{-1}$  ( $R^2 = 0.999$ )

$I_0$  is photon fluence rate (unit: *einstein m<sup>-2</sup>s<sup>-1</sup>*)

From literature (at 253.7 nm):

$$\phi_{atr} = 0.046 \text{ mol} \cdot \text{einstein}^{-1}$$

$$\varepsilon_{atr} = 3860 \text{ m}^2 \text{ mol}^{-1}$$

$$I_0 = \frac{-\frac{\ln\left(\frac{C}{C_0}\right)}{t}}{2.303 \cdot \phi_{atr} \cdot \varepsilon_{atr}} = \frac{0.00247}{2.303 \times 0.046 \times 3860} = 6.05 \times 10^{-6} \text{ einstein m}^{-2} \text{ s}^{-1}$$

$$E = h\nu = \frac{hc}{\lambda}$$

$$h = 6.626 \times 10^{-34} \text{ J} \cdot \text{s}, c = 3 \times 10^8 \text{ m} \cdot \text{s}^{-1}, \lambda = 253.7 \times 10^{-9} \text{ m}$$

$$E = h\nu = \frac{hc}{\lambda} = \frac{6.626 \times 10^{-34} \times 3 \times 10^8}{253.7 \times 10^{-9}} = 7.835 \times 10^{-19} \text{ J}$$

$$\text{Avogadro Constant: } 6.022 \times 10^{23}$$

$$\text{Molar photon energy (Einstein)} = E \times N_A = 7.835 \times 10^{-19} \times 6.022 \times 10^{23} = 471823.7 \text{ J}$$

$$\text{Photon Flux} = \frac{6.05 \times 10^{-6} \times 471823.7 \times 1000}{100^2} = 0.285 \text{ mJ}/(\text{cm}^2 \cdot \text{s})$$

$$\text{For 10 mins of UV irradiation, the UV intensity is } 0.285 \times 60 \times 10 = 170 \text{ mJ}/\text{cm}^2$$

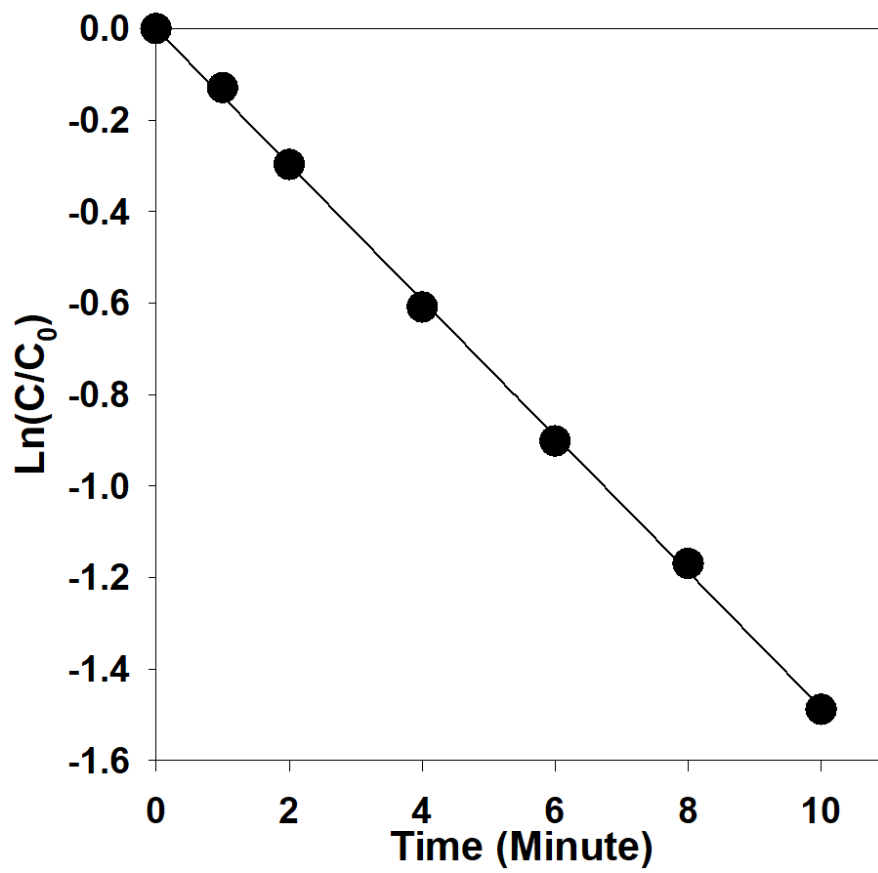

**Figure S1** Atrazine degradation (10 mg/L) under direct photolysis in DI water at pH 7.

## **Text S2** Detection of Lead Dioxide (PbO<sub>2</sub>) in Drinking Water

The mechanism to quantify PbO<sub>2</sub> is that PbO<sub>2</sub> can oxidize iodide to form triiodide (I<sub>3</sub><sup>-</sup>) in the excess of iodide which can be quantified through the UV absorbance. Specifically, 0.4 g KI was added to 10 mL water with PbO<sub>2</sub>. The pH was adjusted to 2 with HCl, and then the suspension was stirred for 1 h at 700 rpm to fully develop the color. The UV absorbance of the final sample was measured at the wavelength of 351 nm to quantify the PbO<sub>2</sub> concentration.

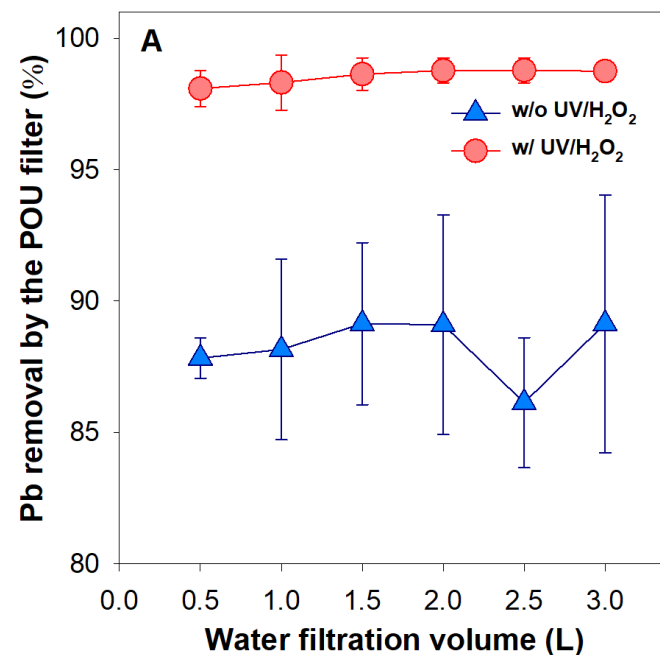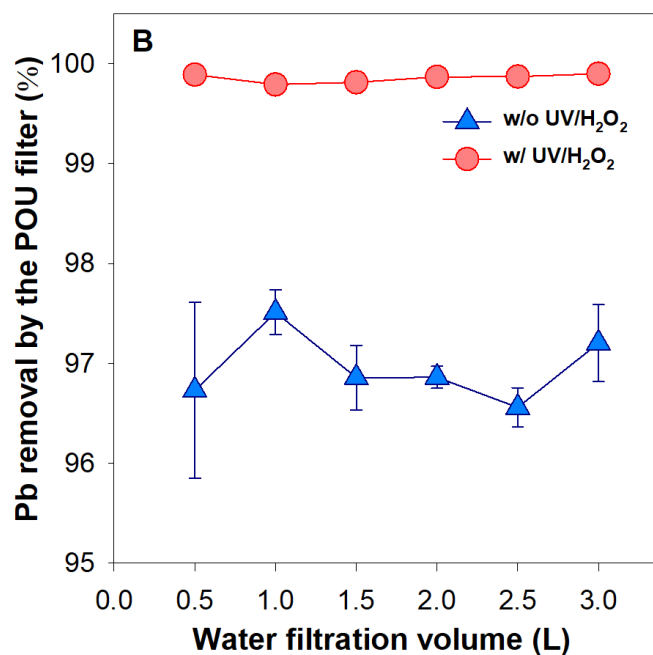

**Figure S2** Percentages of Pb removal after POU faucet filtration with and without UV/H<sub>2</sub>O<sub>2</sub> treatment in synthetic drinking water with 2 mM NaClO<sub>4</sub> at pH 7. (A): [Nano-Pb-PO<sub>4(s)</sub>]=0.1 mg Pb/L and [H<sub>2</sub>O<sub>2</sub>]=0.5 mg/L; and (B): [Nano-Pb-PO<sub>4(s)</sub>]=1 mg/L and [H<sub>2</sub>O<sub>2</sub>]=5 mg/L.

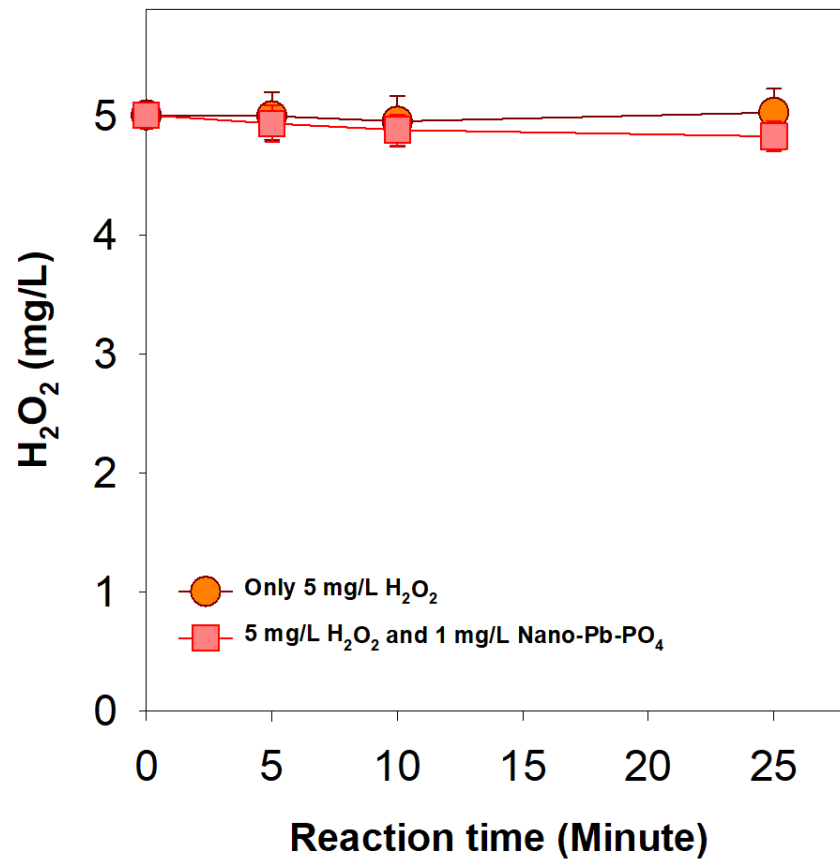

**Figure S3**  $H_2O_2$  concentrations with and without 1 mg/L Nano- $Pb-PO_4$  in synthetic drinking water with 2 mM  $NaClO_4$  at pH 7.

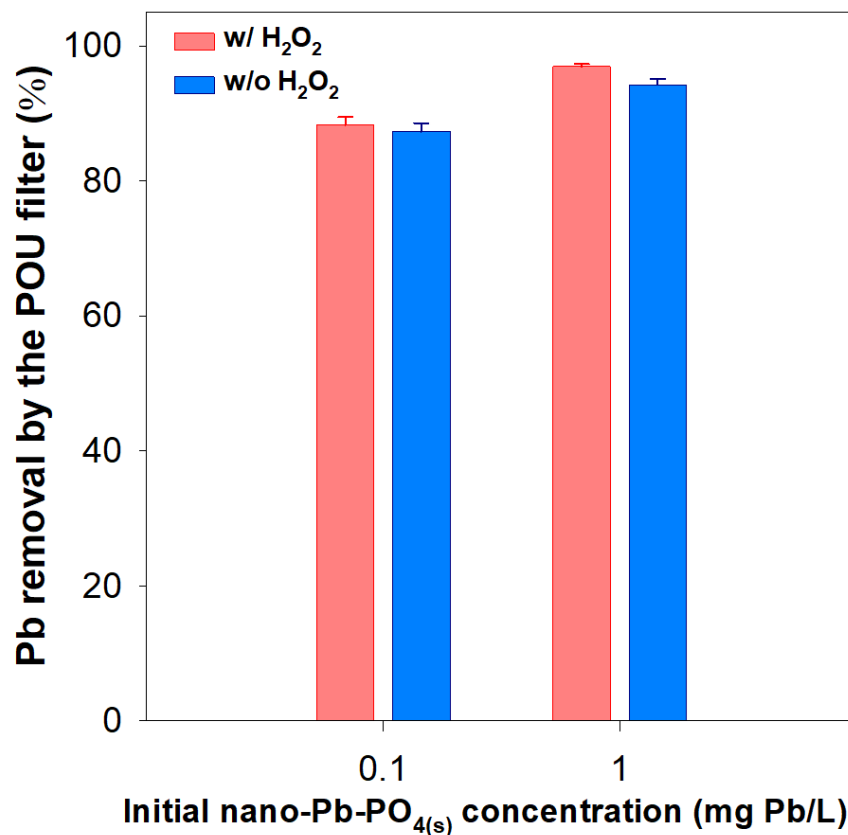

**Figure S4** Percentages of Pb removal after POU faucet filtration with and without H<sub>2</sub>O<sub>2</sub> in synthetic drinking water at pH 7. Treatment received no UV exposure. ([Nano-Pb-PO<sub>4(s)</sub>]=0.1 mg Pb/L and [H<sub>2</sub>O<sub>2</sub>]=0.5 mg/L; and [Nano-Pb-PO<sub>4(s)</sub>]=1 mg/L and [H<sub>2</sub>O<sub>2</sub>]=5 mg/L).

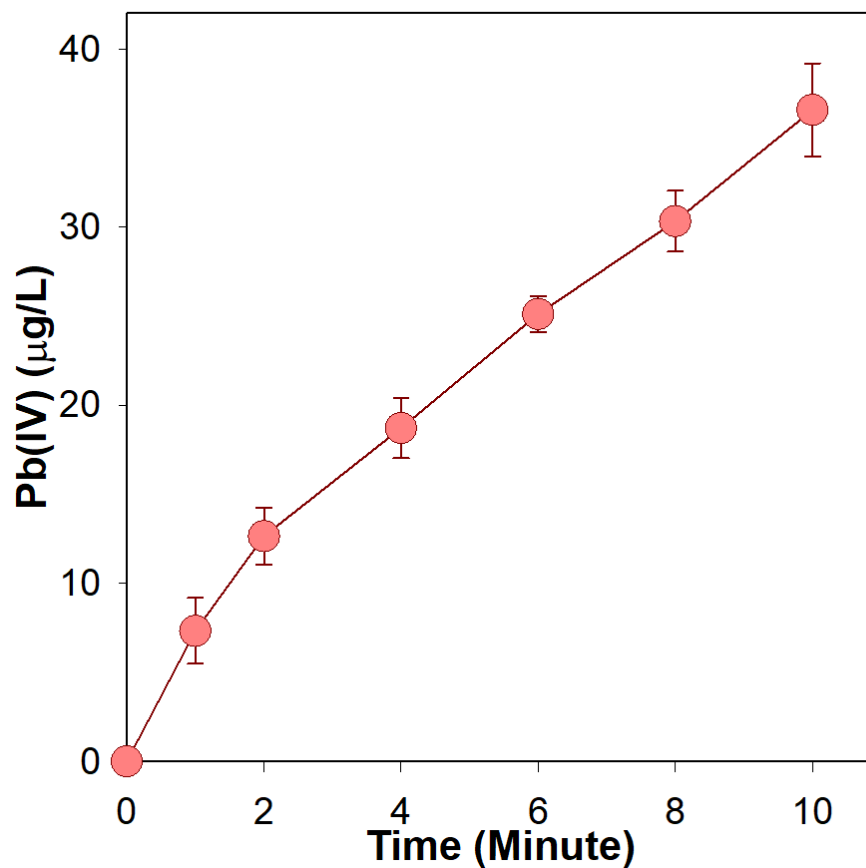

**Figure S5** The formation of Pb(IV) due to the oxidation of nano-Pb-PO<sub>4</sub> under the UV/H<sub>2</sub>O<sub>2</sub> in synthetic drinking water at pH 7. [Nano-Pb-PO<sub>4</sub>]=1 mg Pb/L and [H<sub>2</sub>O<sub>2</sub>]=5 mg/L.

### Text S3 Calculation of the formation rate constant of $\text{PbO}_{2(s)}$

The steady state concentration of  $\text{HO}^\bullet$  was calculated based on the nitrobenzene degradation (Figure S5) and the reaction rate constant between  $\text{HO}^\bullet$  and nitrobenzene ( $4.7 \times 10^9 \text{ M}^{-1}\cdot\text{s}^{-1}$ ):

$$[\text{HO}^\bullet]_{\text{ss}} = (0.1164 \text{ min}^{-1})(\text{slope of Figure S5}) \times (1/60 \text{ min/s}) / (4.7 \times 10^9 \text{ M}^{-1}\cdot\text{s}^{-1}) = 4.13 \times 10^{-13} \text{ M}$$

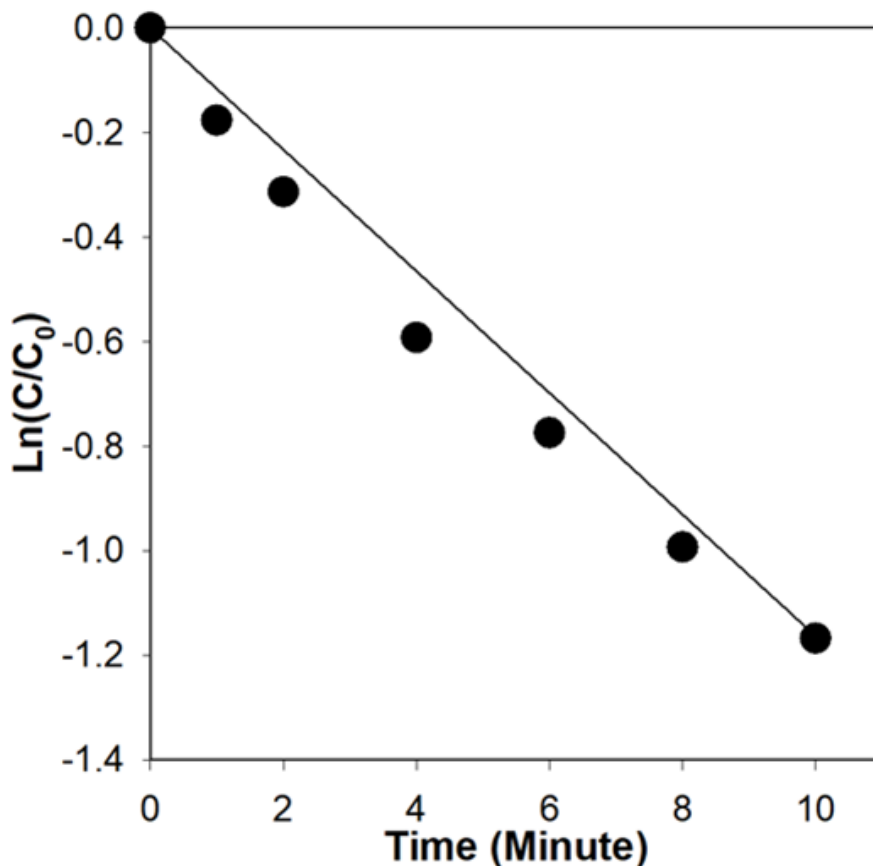

**Figure S6** Nitrobenzene (1 mg/L) degradation under the UV- $\text{H}_2\text{O}_2$  with 5 mg/L of  $\text{H}_2\text{O}_2$  at pH 7.

The formation rate constant of  $\text{PbO}_{2(s)}$  was calculated based on the steady state concentration of  $\text{HO}^\bullet$  and the oxidation kinetics of  $\text{Pb(II)}$  to  $\text{Pb(IV)}$  (Figure S6):

$$k_{\text{Pb(IV)}} = (0.004 \text{ min}^{-1})(\text{slope of Figure S6}) \times (1/60 \text{ min/s}) / (4.13 \times 10^{-13} \text{ mol/L}) = 1.61 \times 10^8 \text{ M}^{-1}\cdot\text{s}^{-1}$$

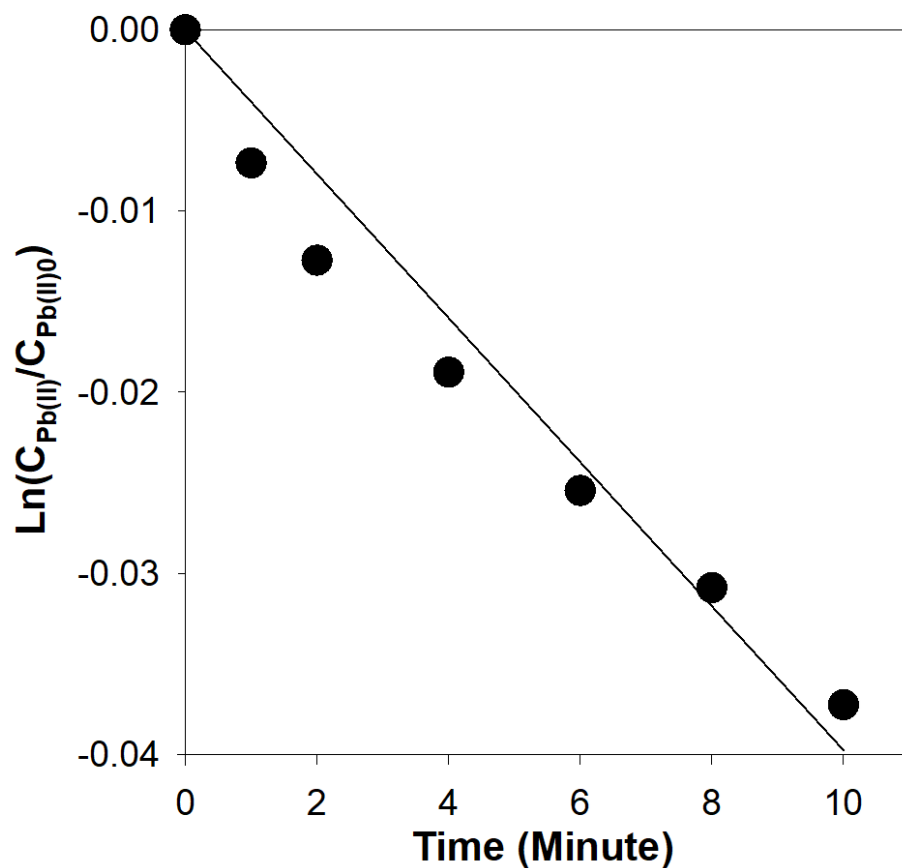

**Figure S7** Oxidation kinetics of Pb(II) to Pb(IV) under the UV/H<sub>2</sub>O<sub>2</sub>. [Nano-Pb-PO<sub>4</sub>]=1 mg Pb/L and [H<sub>2</sub>O<sub>2</sub>]=5 mg/L.

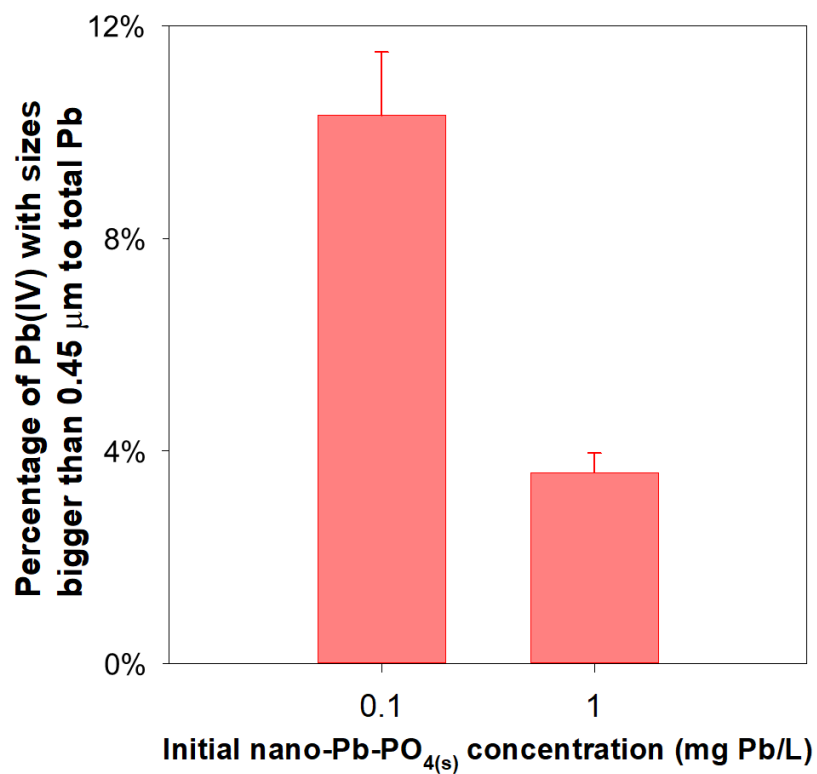

**Figure S8** The percentage of Pb(IV) with sizes bigger than 0.45  $\mu\text{m}$  to total Pb particles after the UV/H<sub>2</sub>O<sub>2</sub> in synthetic drinking water with 2 mM NaClO<sub>4</sub> at pH 7. [Nano-Pb-PO<sub>4</sub>]=0.1 mg Pb/L and [H<sub>2</sub>O<sub>2</sub>]=0.5 mg/L, and [Nano-Pb-PO<sub>4</sub>]=1 mg/L and [H<sub>2</sub>O<sub>2</sub>]=5 mg/L.

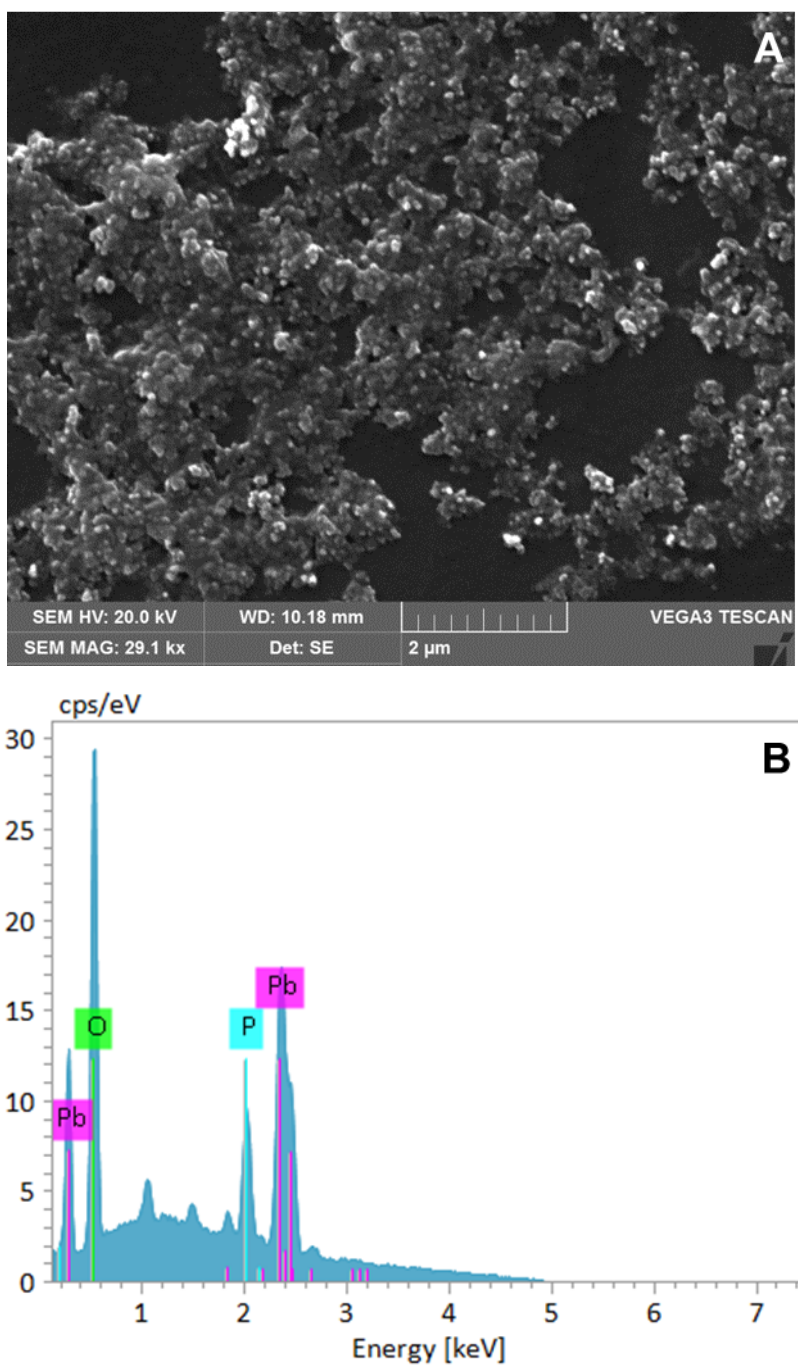

**Figure S9** Characterization of 1 mg Pb/L of nano-Pb-PO<sub>4</sub> before the UV/H<sub>2</sub>O<sub>2</sub>. (A): SEM image; and (B): elemental composition of the Pb particles.

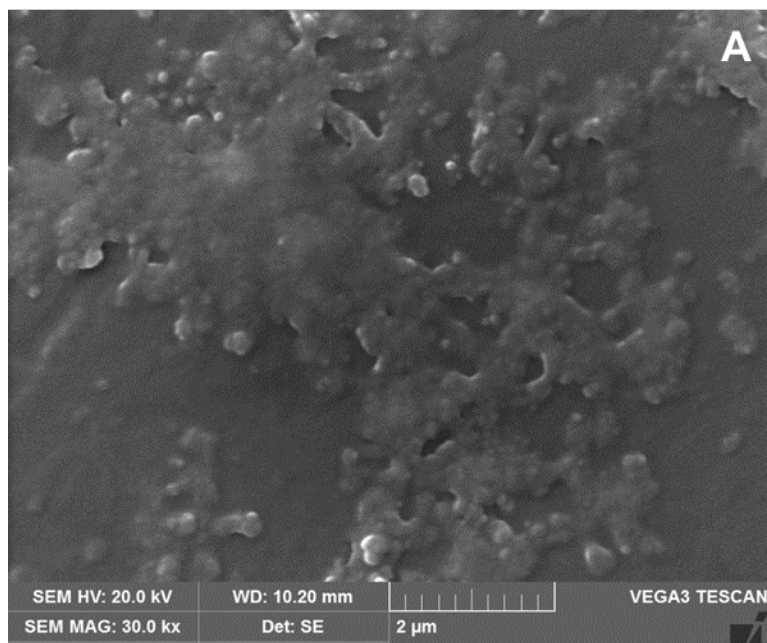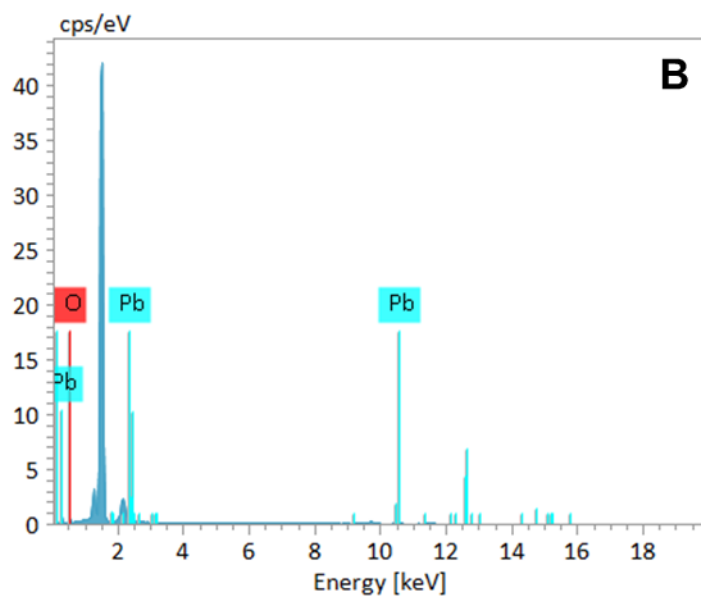

**Figure S10** Characterization of 1 mg Pb/L of nano-Pb-PO<sub>4</sub> after the UV/H<sub>2</sub>O<sub>2</sub>. (A): SEM image; and (B): elemental composition of the Pb particles.
